# Supplementary material for: Wastewater surveillance in the COVID-19 post-emergency pandemic period: A promising approach to monitor and predict SARS-CoV-2 surges and evolution
Source: PubMed Central journal article supplement (PMC10689941; doi:10.1016/j.heliyon.2023.e22356), 2023-11-17

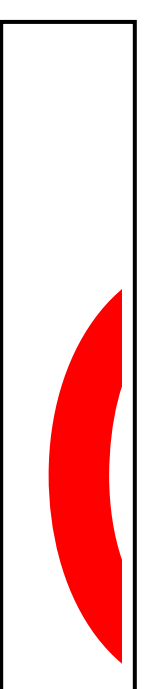

1,000 500 0 1,000 Feet

3/1/2023

City of DeLand Utility Service Boundaries  
Existing Sewer Service Boundary  
City Limits

St Johns River

Fairgrounds

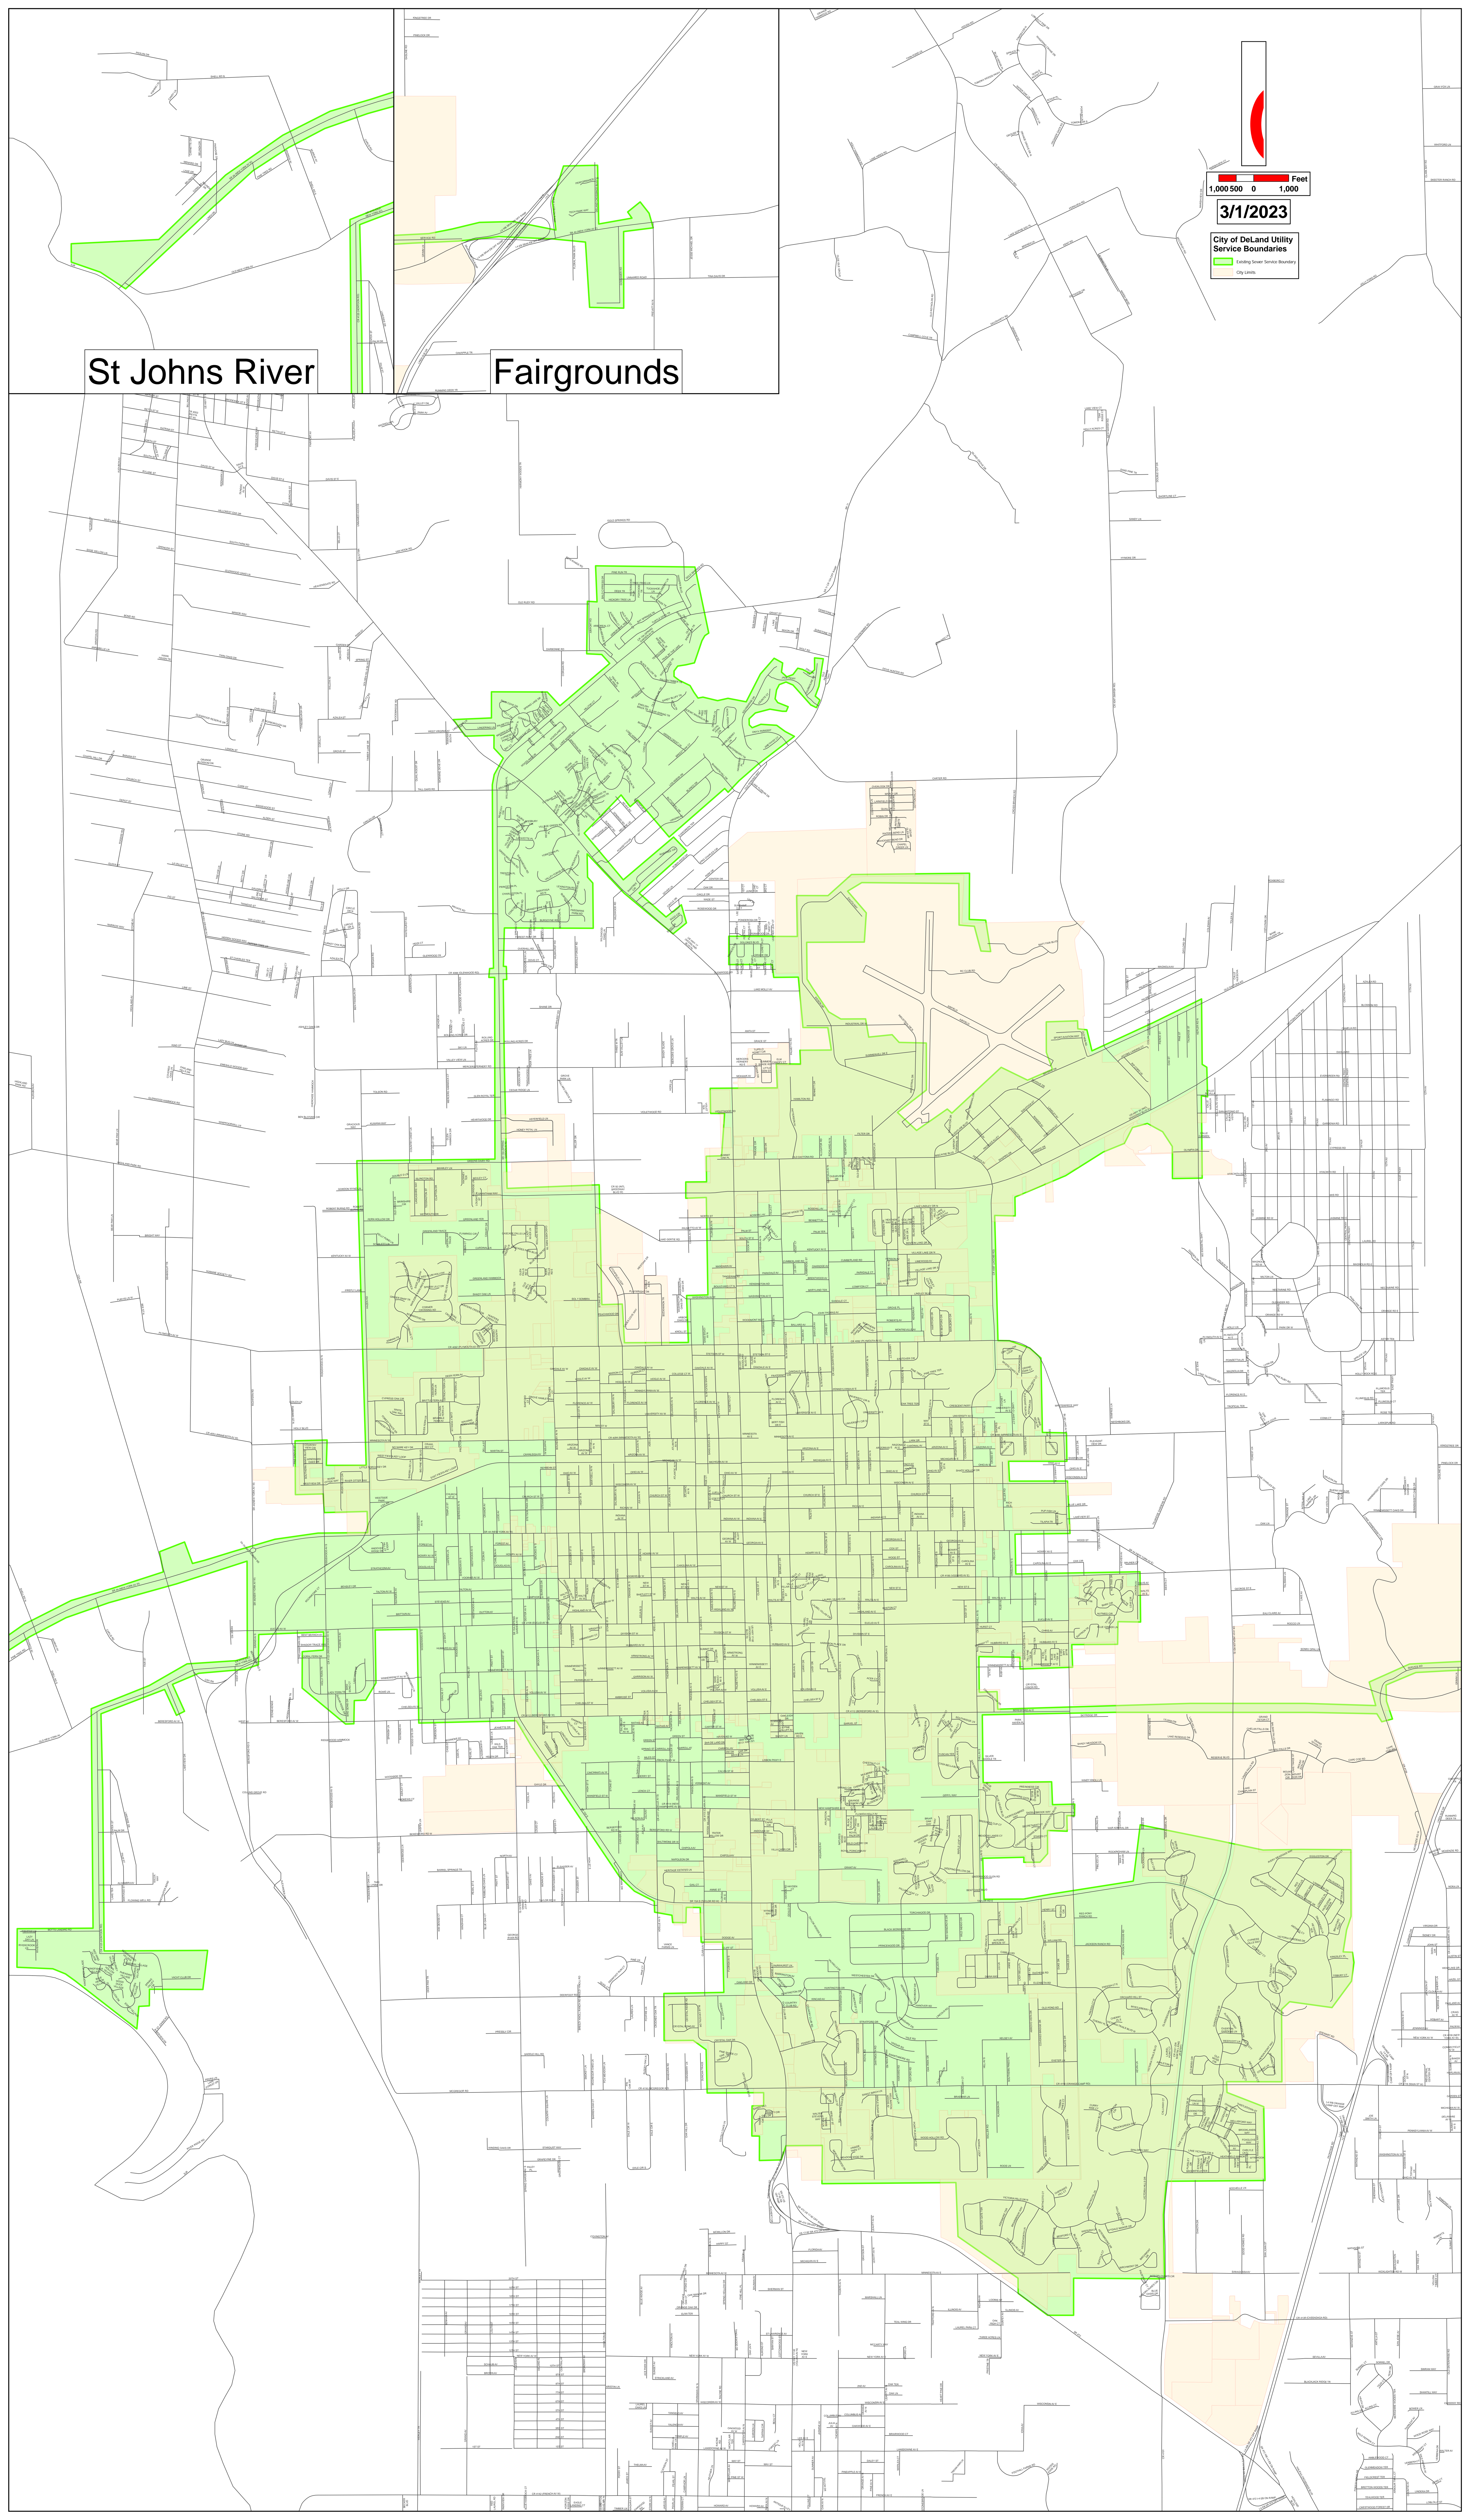

Supplement: mmc1.pdf [file mmc1.pdf]
